# Supplementary material for: Amphiphilic Dendronized Copolymer-Encapsulated Au, Ag and Pd Nanoparticles for Catalysis in the 4-Nitrophenol Reduction and Suzuki–Miyaura Reactions
Source: MDPI journal article supplement (doi:10.3390/polym16081080), 2024-04-12
Supplement: s1 [file s1]

## Supporting Information

# Amphiphilic Dendronized Copolymer-Encapsulated Au, Ag and Pd Nanoparticles for Catalysis in the 4-Nitrophenol Reduction and Suzuki–Miyaura Reactions

Fangfei Liu and Xiong Liu \*

State Key Laboratory of Chemistry and Utilization of Carbon Based Energy Resources; College of Chemistry, Xinjiang University, Urumqi, 830017, Xinjiang, PR China.

\* Correspondence: liuxiong@xju.edu.cn

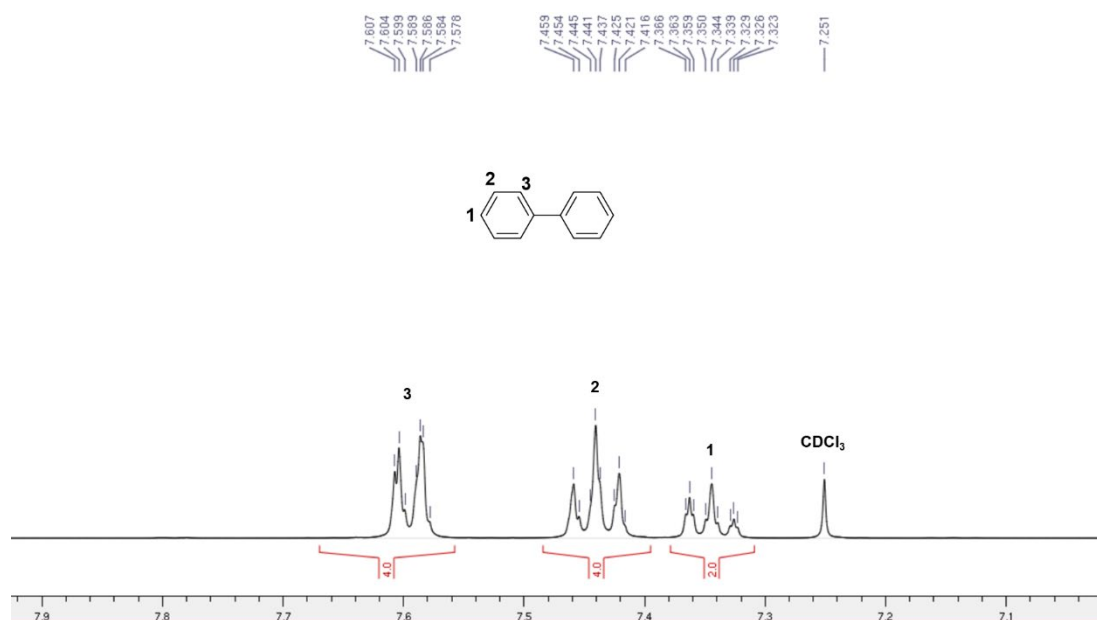

**Figure S1.**  $^1\text{H}$  NMR spectra of 1,1'-biphenyl.

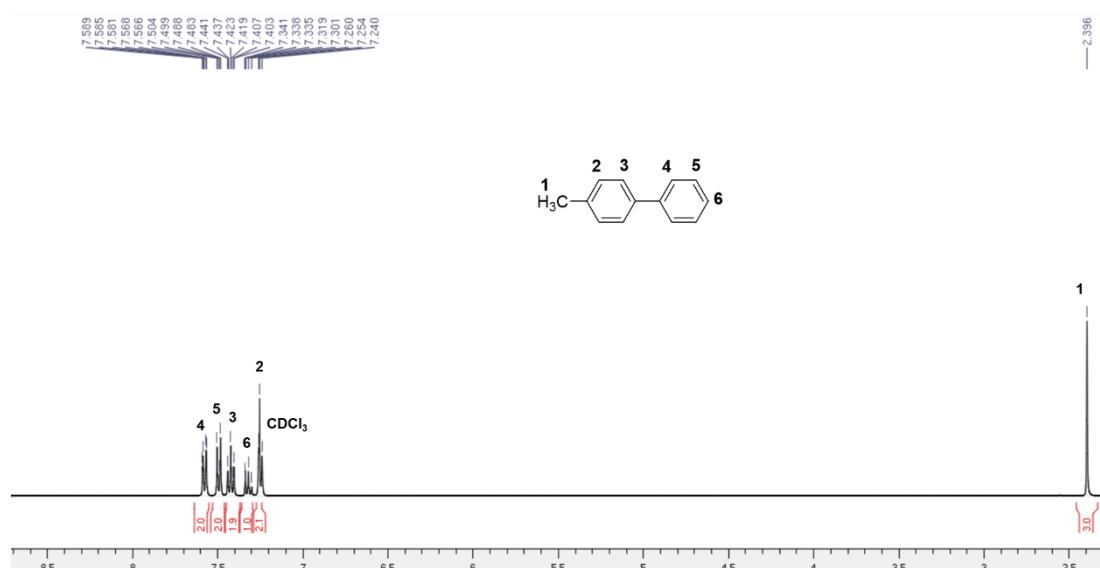Figure S2. <sup>1</sup>H NMR spectra of 4-methyl-1,1'-biphenyl.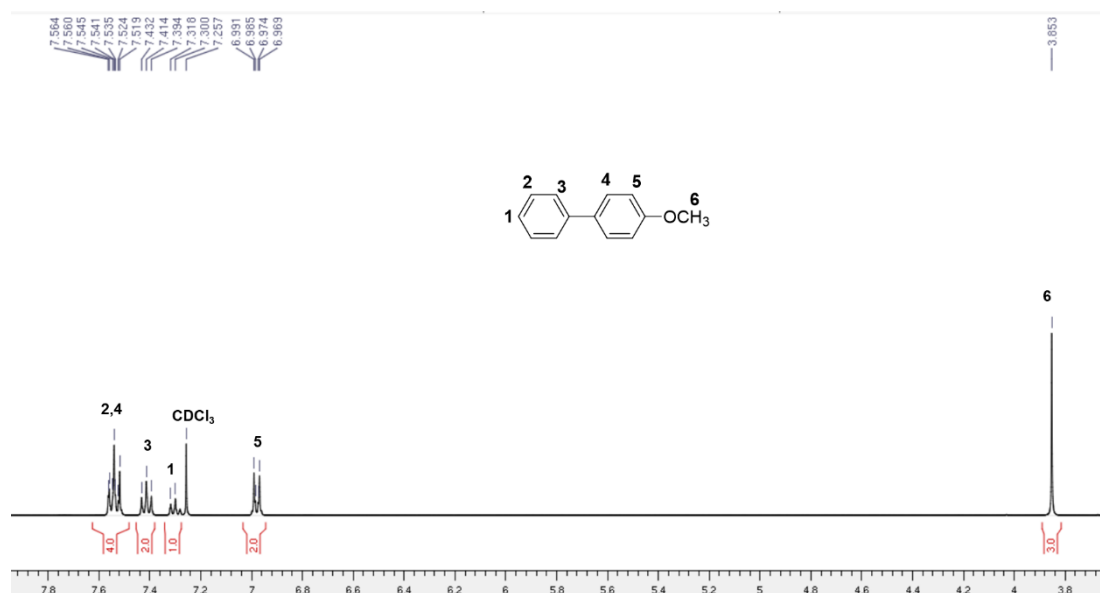Figure S3. <sup>1</sup>H NMR spectra of 4-methoxy-1,1'-biphenyl.

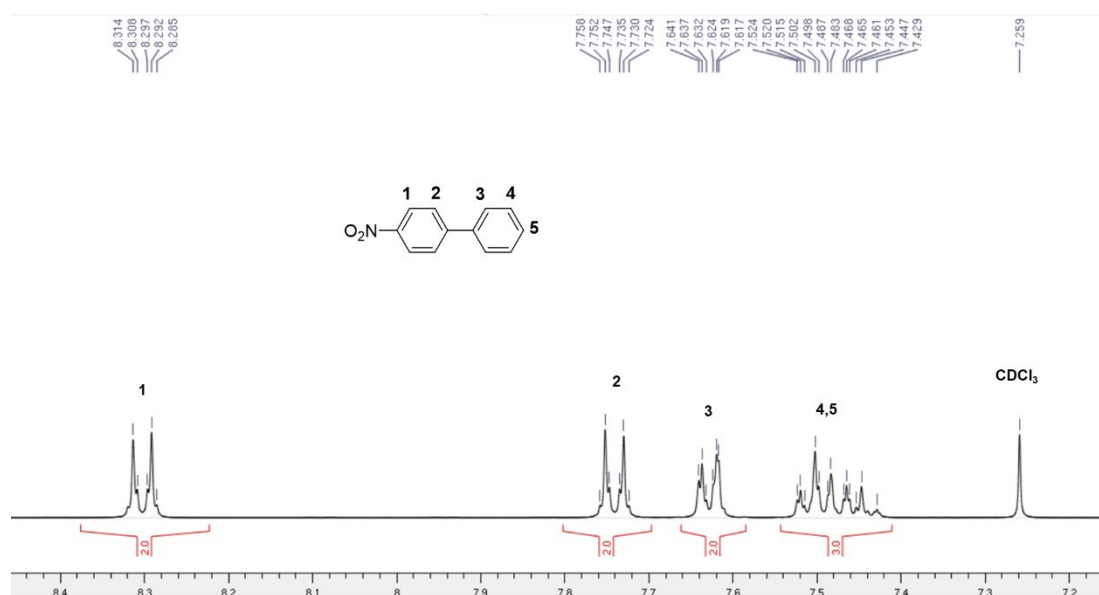

Figure S4.  $^1\text{H}$  NMR spectra of 4-nitro-1,1'-biphenyl.

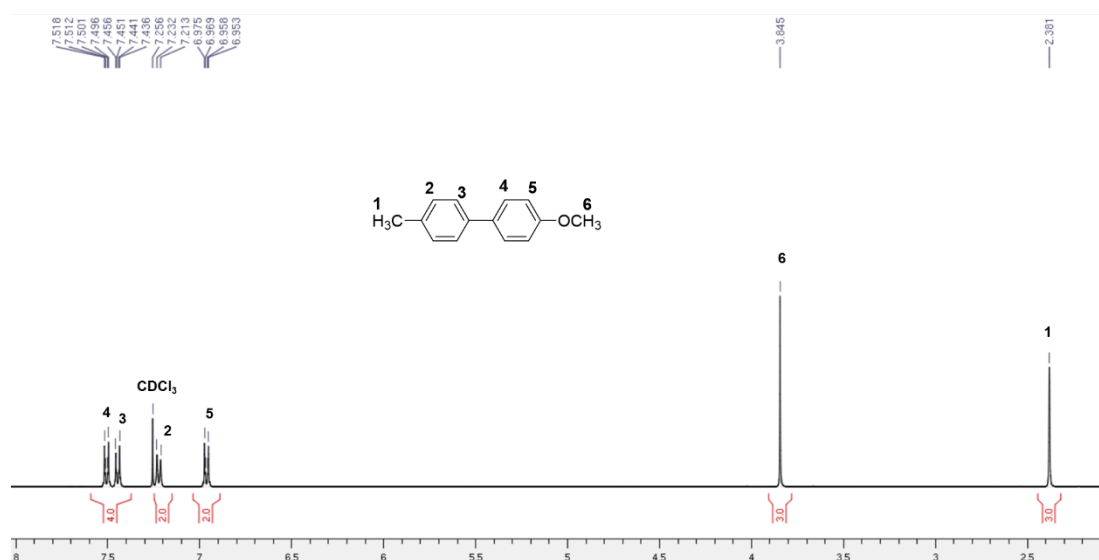

Figure S5.  $^1\text{H}$  NMR spectra of 4-methoxy-4'-methyl-1,1'-biphenyl.

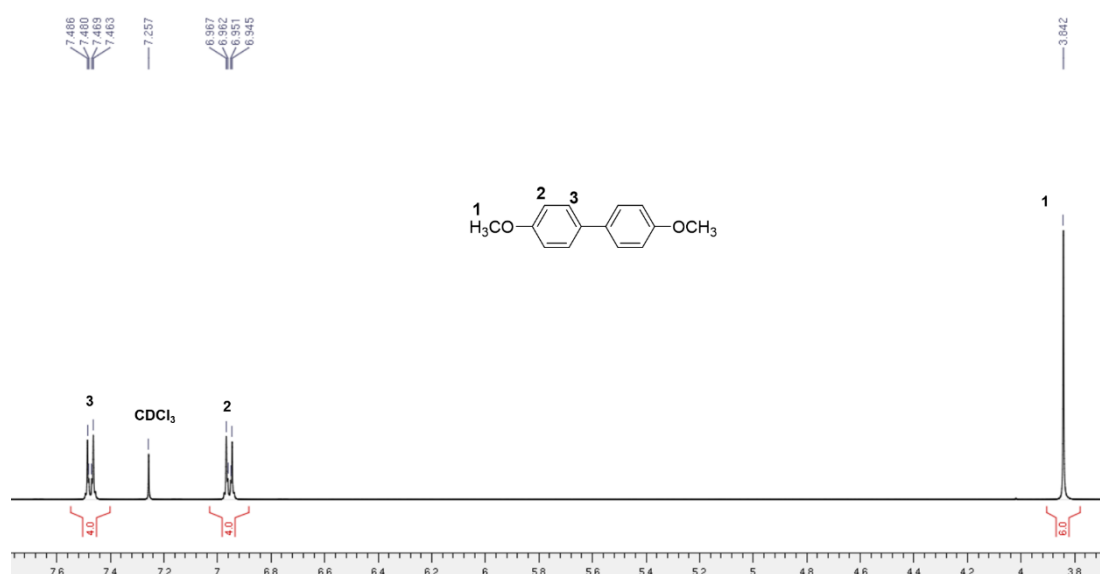Figure S6. <sup>1</sup>H NMR spectra of 4,4'-dimethoxy-1,1'-biphenyl.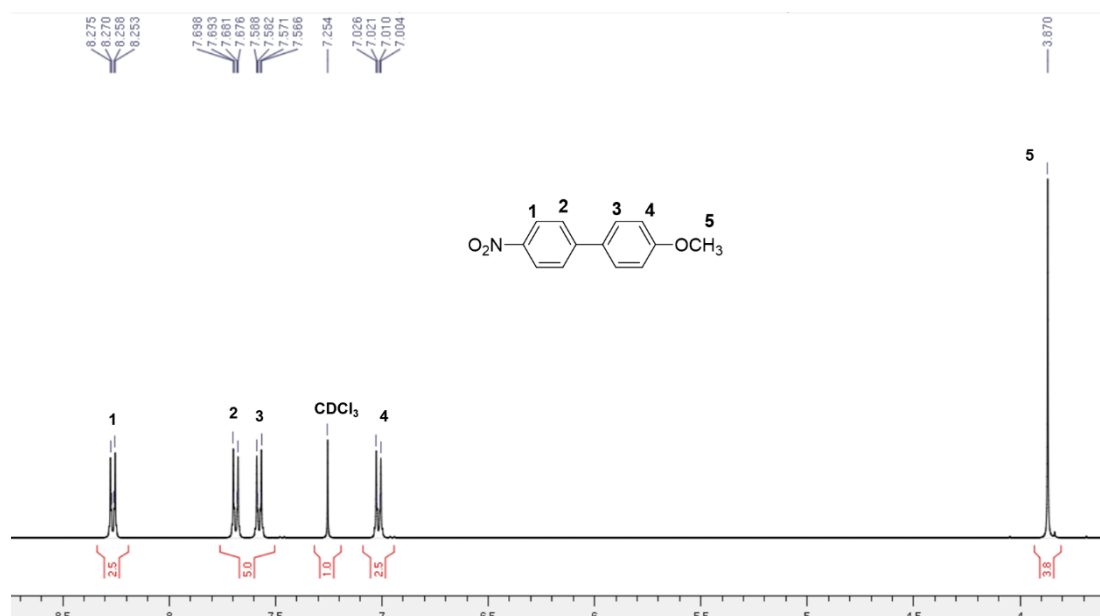Figure S7. <sup>1</sup>H NMR spectra of 4-methoxy-4'-nitro-1,1'-biphenyl.

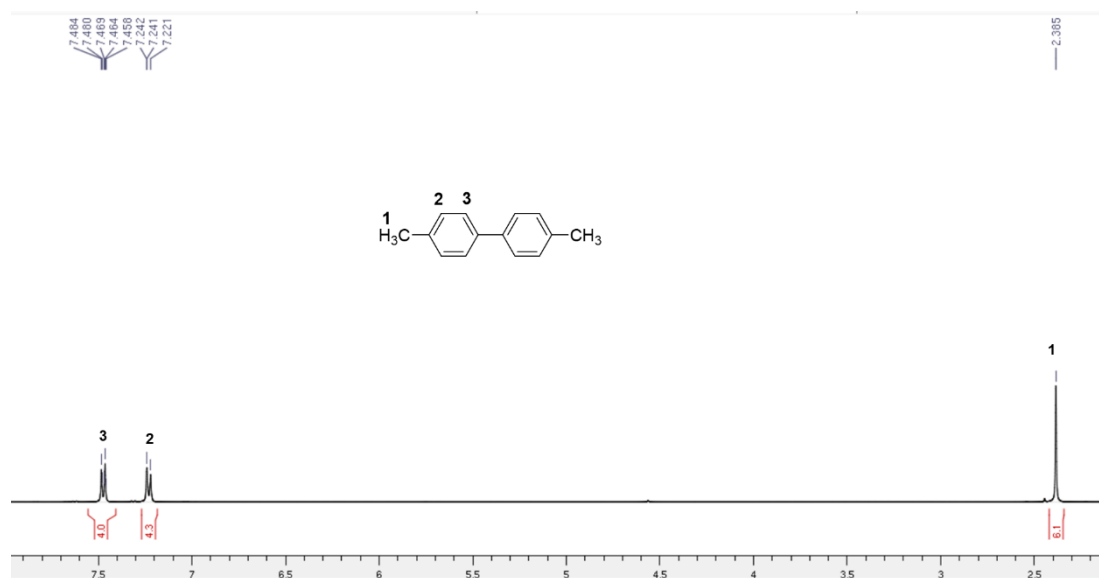

Figure S8. <sup>1</sup>H NMR spectra of 4,4'-dimethyl-1,1'-biphenyl.

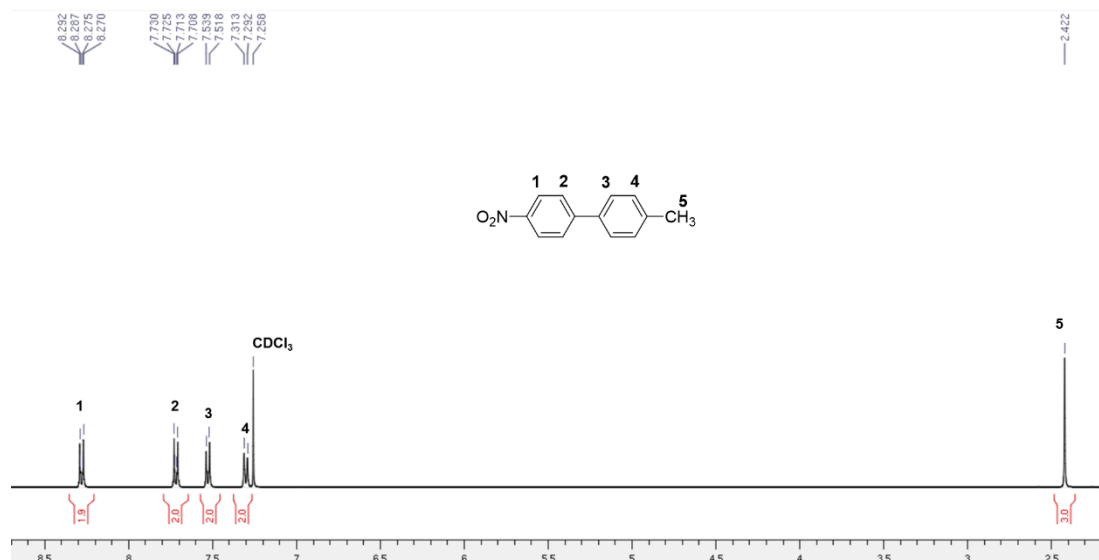

Figure S9. <sup>1</sup>H NMR spectra of 4-methyl-4'-nitro-1,1'-biphenyl.
